# Supplementary material for: Diosbulbin B-Induced Mitochondria-Dependent Apoptosis in L-02 Hepatocytes is Regulated by Reactive Oxygen Species-Mediated Autophagy
Source: PubMed Central journal article supplement (PMC6593359; doi:10.3389/fphar.2019.00676), 2019-06-19
Supplement: DataSheet_1.pdf [file DataSheet_1.pdf]

## Supplementary Material

### Diosbulbin B Induced Mitochondria-Dependent Apoptosis in L-02 Hepatocytes is Regulated by ROS-Mediated Autophagy

Jing Ye<sup>1a</sup>, Mei Xue<sup>2a</sup>, Yamin Liu<sup>3</sup>, Sirui Zhu<sup>1</sup>, Yu Li<sup>1</sup>, Xiaoli Liu<sup>1</sup>, Danhong Cai<sup>1</sup>, Jia Rui, Liang Zhang<sup>1b</sup>

<sup>1</sup>College of Pharmacy, Nanjing University of Chinese Medicine, Nanjing, Jiangsu, China

<sup>2</sup>College of Preclinical Medicine, Nanjing University of Chinese Medicine, Nanjing, Jiangsu, China

<sup>3</sup>Department of Pharmacy, Zhongda Hospital, Southeast University, Nanjing Jiangsu, China

<sup>a</sup>These authors contributed equally to this work.

<sup>b</sup>Address correspondence to Liang Zhang, College of Pharmacy, Nanjing University of Chinese Medicine, Nanjing, Jiangsu, China (Zhangl\_1999@163.com)

#### Supplementary Fig S1

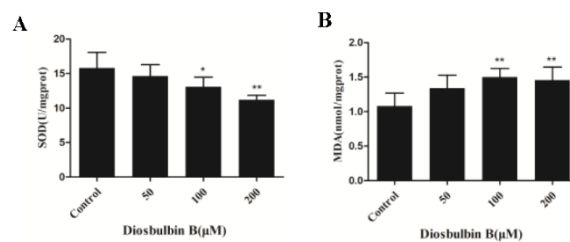

(A-B) The levels of MDA and SOD in cells treated with DB(0,50,100,200μM) for 48h were analyzed with a microplate reader. \*\*P<0.01, \*P<0.05, compared to control group.

#### Supplementary Fig S2

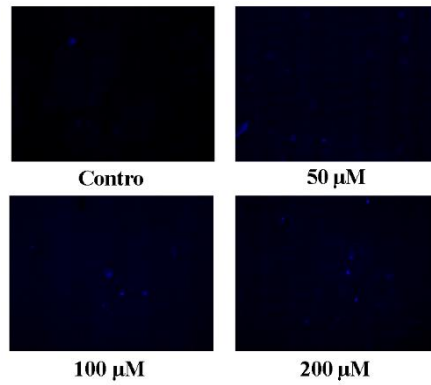

MDC staining assay was applied to detect autophagy in L-02 cells treated with DB(0,50,100,200μM) for 48h.

### Supplementary Fig S3

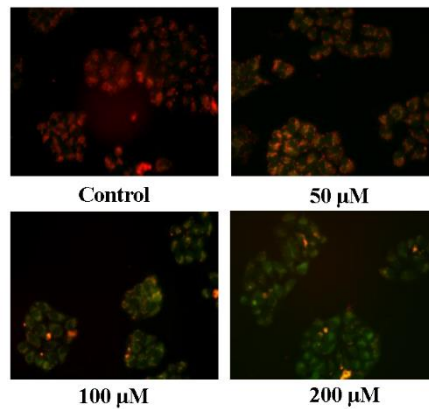

The fluorescent images of JC-1 staining in L-02 cells treated with DB(0,50,100,200μM) for 48h

### Supplementary Fig S4

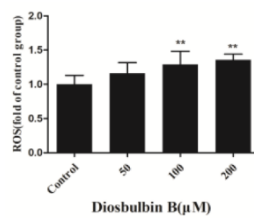

The fluorescence intensity of ROS in L-02 cells treated with DB(0,50,100,200μM) for 48h

### Supplementary Fig S5

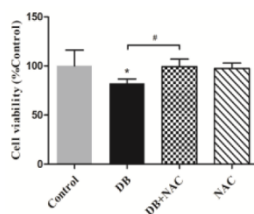

Cell viability of L-02 cells applied with medium (control group), DB(100 $\mu$ M) and NAC(5mM) or the combination. \*P<0.05, compared to control group.
